# Supplementary material for: Urban Matrices Threaten Patch Occurrence of Howler Monkeys in Anthropogenic Landscapes
Source: MDPI journal article supplement (doi:10.3390/land13040514), 2024-04-13
Supplement: s1 [file s1]

# Urban matrices threaten patch occurrence of howler monkeys in anthropogenic landscapes

## Supplementary material

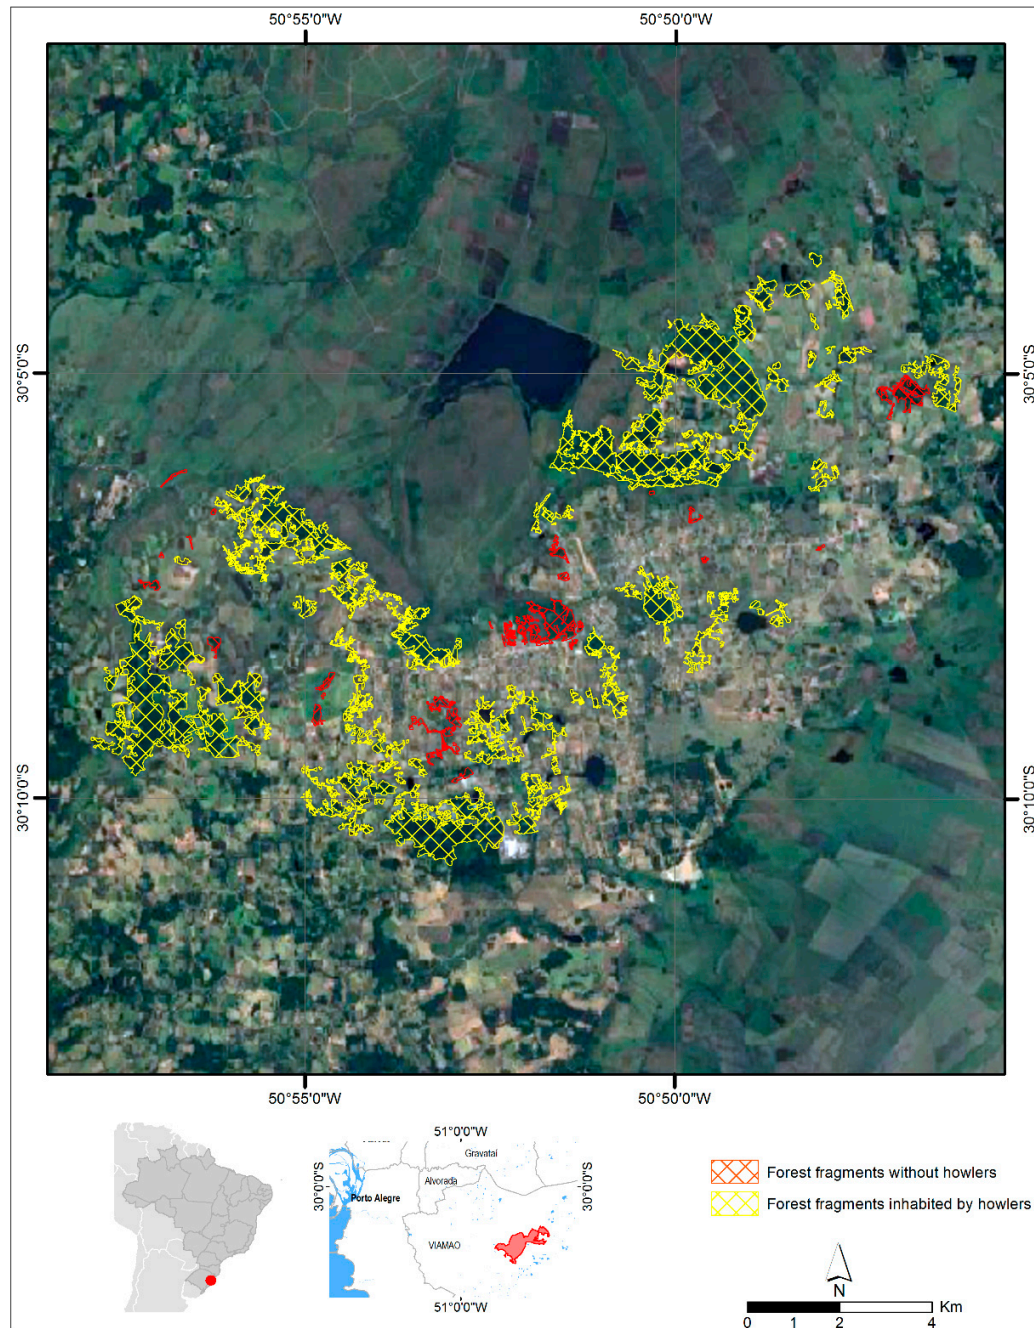

**Figure S1.** Location of the study area in the Águas Claras district in the state of Rio Grande do Sul, Brazil. Forest patches inhabited by howler monkeys are marked in yellow, whereas non-inhabited patches are marked in red.

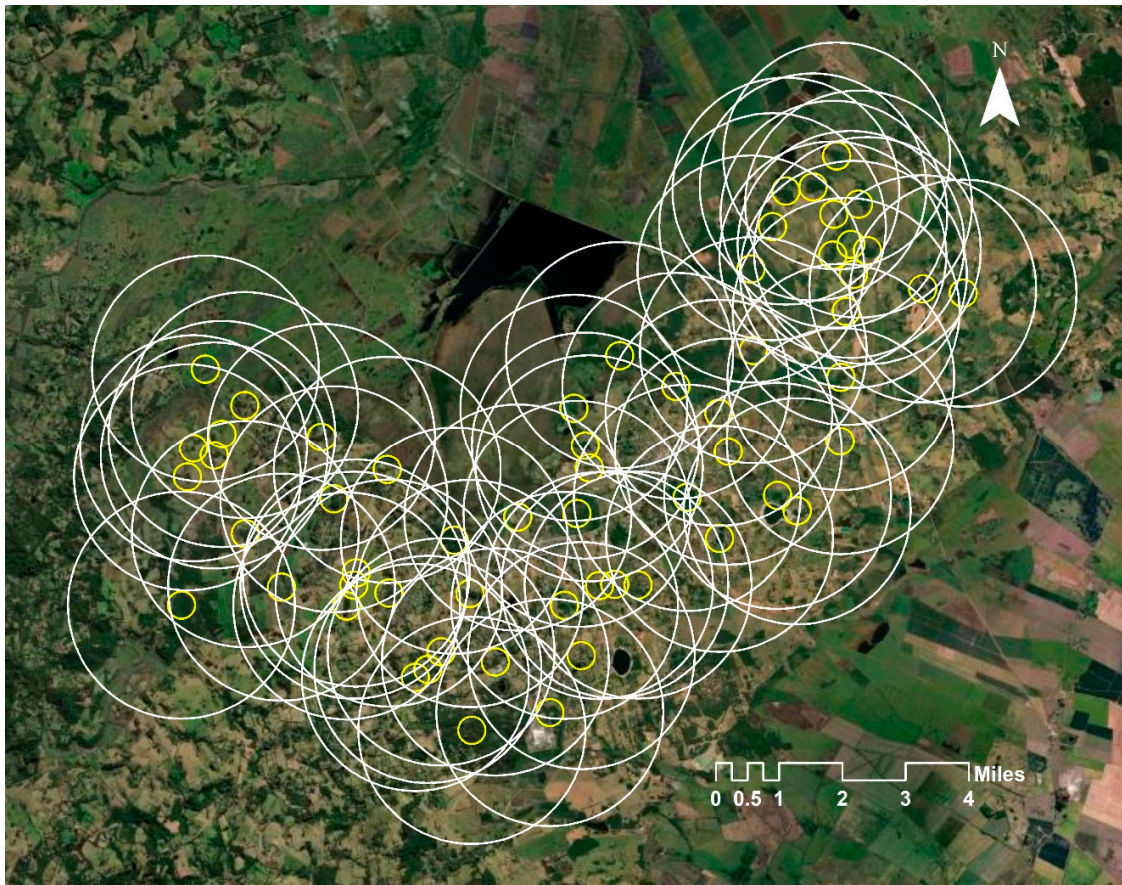

**Figure S2.** Locations of the study patches in the Águas Claras district in the state of Rio Grande do Sul, Brazil. The smallest buffers per patch used after identifying the scale of effect (with a 300-m radius) are shown in yellow, and the largest buffer (with a 2,500-m radius) are shown in white.
