# Supplementary material for: Urban Matrices Threaten Patch Occurrence of Howler Monkeys in Anthropogenic Landscapes
Source: MDPI journal article supplement (doi:10.3390/land13040514), 2024-04-13
Supplement: s1 [file s1]

Archive with 1 entries (1 files):
- land-2878767-supplementary.pdf
